# Supplementary material for: Compartmentalization of Intrarenal Programmed Cell Death Protein 1-Ligand 1 and Its Receptor in Kidney Injury Related to Immune Checkpoint Inhibitor Nephrotoxicity
Source: PubMed Central journal article supplement (PMC9218249; doi:10.3389/fmed.2022.902256), 2022-06-09
Supplement: Data_Sheet_1.pdf [file Data_Sheet_1.pdf]

**Compartmentalization of intrarenal programmed cell death  
protein 1-ligand 1 and its receptor in kidney injury  
related to immune checkpoint inhibitor nephrotoxicity**

**Supplementary Material**

Désirée Tampe<sup>1</sup>, Sarah Birgit Kopp<sup>1</sup>, Eva Baier<sup>1</sup>, Samy Hakrrouch<sup>2</sup>, Björn Tampe<sup>1,#</sup>

<sup>1</sup>*Department of Nephrology and Rheumatology, University Medical Center Göttingen,  
Göttingen, Germany*

<sup>2</sup>*Institute of Pathology, University Medical Center Göttingen, Göttingen, Germany*

<sup>#</sup>*Corresponding author*

Running title: Renal PD-L1/PD-1 in ICI-related nephrotoxicity

Corresponding author:

Björn Tampe, MD

Department of Nephrology and Rheumatology

University Medical Center Göttingen

Georg August University

Göttingen, Germany

Email: [bjoern.tampe@med.uni-goettingen.de](mailto:bjoern.tampe@med.uni-goettingen.de)

**Supplementary Table 1. Pathways correlated with tubulointerstitial CD274 mRNA expression.**

| Pathway                                                                  | Entities found | Entities total | Entities ratio | Entities p | Entities FDR | Species      |
|--------------------------------------------------------------------------|----------------|----------------|----------------|------------|--------------|--------------|
| Immunoregulatory interactions between a Lymphoid and a non-Lymphoid cell | 8              | 316            | 0.021          | 2.13E-5    | 4.3E-3       | Homo sapiens |
| Transport of glycerol from adipocytes to the liver by Aquaporins         | 2              | 3              | 0              | 6.03E-5    | 6.09E-3      | Homo sapiens |
| DAP12 interactions                                                       | 3              | 53             | 0.004          | 1.04E-3    | 6.98E-2      | Homo sapiens |
| TP53 Regulates Transcription of Caspase Activators and Caspases          | 2              | 20             | 0.001          | 2.57E-3    | 1.13E-1      | Homo sapiens |
| Passive transport by Aquaporins                                          | 2              | 21             | 0.001          | 2.83E-3    | 1.13E-1      | Homo sapiens |
| MECP2 regulates neuronal receptors and channels                          | 2              | 32             | 0.002          | 6.41E-3    | 1.93E-1      | Homo sapiens |
| Peptide ligand-binding receptors                                         | 4              | 203            | 0.013          | 6.88E-3    | 1.93E-1      | Homo sapiens |
| Thrombin signalling through proteinase activated receptors (PARs)        | 2              | 36             | 0.002          | 8.03E-3    | 2.01E-1      | Homo sapiens |

**Supplementary Table 2. Pathways correlated with tubulointerstitial *PDCD1* mRNA expression.**

| Pathway                                                                | Entities found | Entities total | Entities ratio | Entities p | Entities FDR | Species      |
|------------------------------------------------------------------------|----------------|----------------|----------------|------------|--------------|--------------|
| Class B/2 (Secretin family receptors)                                  | 18             | 99             | 0.007          | 4.00E-05   | 4.32E-2      | Homo sapiens |
| Potassium Channels                                                     | 16             | 107            | 0.007          | 8.48E-4    | 4.67E-1      | Homo sapiens |
| Highly sodium permeable postsynaptic acetylcholine nicotinic receptors | 4              | 9              | 0.001          | 2.19E-3    | 4.83E-1      | Homo sapiens |
| Presynaptic nicotinic acetylcholine receptors                          | 5              | 15             | 0.001          | 2.2E-3     | 4.83E-1      | Homo sapiens |
| Acetylcholine binding and downstream events                            | 5              | 17             | 0.001          | 3.73E-3    | 5.86E-1      | Homo sapiens |
| Postsynaptic nicotinic acetylcholine receptors                         | 5              | 17             | 0.001          | 3.73E-3    | 5.86E-1      | Homo sapiens |
| Voltage gated Potassium channels                                       | 8              | 44             | 0.003          | 5.31E-3    | 7.27E-1      | Homo sapiens |
| Antimicrobial peptides                                                 | 15             | 123            | 0.008          | 7.75E-3    | 8.13E-1      | Homo sapiens |
| GPCR ligand binding                                                    | 51             | 606            | 0.04           | 8.69E-3    | 8.13E-1      | Homo sapiens |
| Interleukin-36 pathway                                                 | 3              | 7              | 0              | 8.7E-3     | 8.13E-1      | Homo sapiens |
